# Supplementary material
Source: ML conference proceedings conference paper supplement (https://openreview.net/forum?id=-TSe5o7STVR)
Supplement: supplementary_material [file attachment]

All the following samples are organized as:

The first is the source style sentence

The second is the human-written target style sentence

The third is the LaMer generated target style sentence

Yelp:

1. i 'd definitely recommend giving them a try .

i 'd definitely recommend not giving them a try .

i would not recommend this place to anyone.

1. these two women are professionals .

these two women are not professionals .

these people are incompetent and unprofessional.

1. we were both so impressed .

we were both unimpressed .

we were so disappointed.

1. she did the most amazing job .

she did the most awful job .

she did a poor job.

1. i will definitely return often !

i will definitely not return often !

i will not be back.

1. the food here is delicious .

the food here is gross .

the food was awful.

1. the service has always been wonderful .

the service was frustrating .

the service was terrible.

1. prices are a tad high but worth it .

prices are a tad high and not worth it .

prices are too high for what you get.

1. loved the burgers , i had the jalapeo ranch burger it was really tasty .

i had the jalapeno ranch burger , it was n't that tasty .

i ordered a burger and it was terrible.

1. these guys are top notch , honest and very reasonable .

the people are just ok , might be honest .

these guys are incompetent and unprofessional.

1. giving an extra star for customer service .

they should have zero starts .

terrible customer service.

1. one of my favorite chinese place to eat !

i would not visit this place again .

this is the worst chinese food i have ever had in my entire life.

1. great staff and wonderful food .

the staff and food was n't good .

horrible service and food.

1. this place reminds me of home !

this place reminds me why i want to go home .

this place is horrible.

1. i will definitely go here again !

i will never go here again !

i will not be back here again.

Formality:

1. I do not intend to be mean.

I don't want to be mean.

I don't mean to sound mean.

1. However, he may enjoy all of the waiting, dreaming and flirting.

But he might enjoy all the waiting, dreaming & teasing.

If he loves you he will wait.

1. That is if both of you agree to do this.

That's if u both agreed on doing this.

if you both want to, then go for it.

1. How do I get my significant other to show me that he loves me.

how do I get my sweetheart to show me he loves me

How do I tell if he loves me?

1. You should never allow a man to mistreat you.

YOU NEVER LET A MAN MISTREAT YOU

Don't let him do that to you.

1. Find the one who loves you also.

Just find one that loves you too.

find someone who loves you the same way you love them.

1. Stay very far away from this man.

Stay 100 miles away from this guy.

Don't let him get to you.

1. Sexual intercourse is not the only thing important in life!

SEX IS NOT THE ONLY THING IMPORTANT IN LIFE DAMN IT!!!!!

Sex is not that big of a deal.

1. When you are wither her, just be yourself.

JUST BE YOURSELF WHEN YOU ARE WITH HER.

Just be yourself and don't try to be someone you aren't.

1. You will have to find an answer yourself.

you have to search yourself for this one...

you will have to ask yourself this question.

1. You are definitely not a promiscuous woman, so do not worry.

you are definitely not a hoe, don't worry.

no, you are not a whore.

1. If you honestly love him then you will tell him.

If you truely love him you will tell him

If you really love him, tell him.

1. If you're honestly attracted to her, go with your emotions.

Just go with your feelings if you like her so much then go with it.

If you really love her, go for it.

1. It seems very complicated; Could you please explain it again in simple terms?

it is very complcated tell it again please but in simple

You can't make it that simple, can you?

1. If you are interested in the man, then attempt it.

If you like the guy then go for it.

if you really want to know then go for it.

Allsides:

1. Trump White House will release tax reform plan next week

Trump to unveil tax cut he says could be biggest ever

The White House released a statement on Monday saying the administration will be releasing its tax reform plan by the end of the week..

1. Funeral service honors George Floyd in his hometown of Houston

George Floyd Being Laid to Rest in Hometown of Houston After Private Memorial Service

The funeral service for George Floyd was held at the National Cathedral of the Holy Sepulchre in Washington, D.C., and was attended by members of the U.S. House of Representatives.

1. Oscar Pistorius Guilty of Culpable Homicide

Judge finds Oscar Pistorius guilty of culpable homicide

Pelosi was acquitted of the charges of murder and attempted murder, but was convicted of one count of obstruction of justice.

1. Trump Foundation acknowledges violating self dealing ban

Where are Trump Foundation Funds Actually Going?

The Trump Foundation, which was founded by President Trump s son in law Jared Kushner, is accused of profiting off of his father s charitable foundation, the New York Times reported.

1. Attorney General William Barr doubles down on spying claims, questions origins of Russia probe

Bill Barr vows to uncover exactly what happened with Russia probe, says explanations have been inadequate

Barr has been investigating the origins of the Trump Russia probe for more than a year.

1. HouseLikely to Pass Continuing Resolution on Thursday

House Republicans unveil government funding measure

House Speaker John Boehner, Ohio Republican, said Thursday that he s confident the Senate will pass a spending bill by the end of the week..

1. Fully vaccinated people can gather without masks, CDC says

Travel restrictions won t be lifted until more people vaccinated, White House says

The CDC did not provide any specific numbers on the number of people who have been vaccinated, but did say that there is a high risk of transmission of the virus to others who have not been vaccinated..

1. Clinton survives 11 hour Benghazi grilling

Benghazi The fundamental question that still hasn t been answered

Clinton, who has been under intense scrutiny over her handling of the Benghazi terror attacks, said in a statement that the attack on the U.S. consulate in Benghazi, Libya, was a terrorist attack and that it was an attack by a loser terrorist and they must be dealt with in a much tougher manner..

1. Israel and Hamas Step Up Air Attacks in Gaza Clash

Israel launches retaliation strikes against Hamas rocket attacks

The Israeli government said the airstrikes were aimed at stopping an attack by the Palestinian militant group Hamas, which has claimed responsibility for carrying out the attacks..

1. Americans enter 2014 with plunging faith in government

Americans, Again, Say Government Is Shockingly Incompetent

The Obama administration is trying to make America great again, but that doesn t mean we re going to be great again.

1. Michael Bloomberg is finally officially running for president

Michael Bloomberg officially declares White House bid

Michael Bloomberg, pictured at a pro Donald Trump rally in Ohio on July 18, 2016, is running for president.

1. This Is What Making History Looks Like

Clinton Declares Victory and Makes History This is For All of You

We re going to make history, and it s going to be a big deal, he said.

1. Amid Political Upheaval, Ukraine Faces Dire Need for Economic Help

Ukraine s new leaders order arrest of former President Yanukovych

The U.S. has been a major supporter of Ukraine s efforts to restore order in the east of the country, and has been among the most vocal critics of President Poroshenko s policies.

1. Criticism of Holder Dominates Hearing on Loretta Lynch, Attorney General s Possible Successor

Sen. Patrick Leahy Focus on Loretta Lynch s credentials during confirmation

The House Judiciary Committee is scheduled to hold a hearing on the bill on Wednesday, and Attorney General Loretta Lynch is expected to make a final decision on whether to send it to the Senate floor for a vote..

1. Tillerson, on Eve of Russia Trip, Takes Hard Line on Syria

Tillerson, G7 ministers look to pressure Russia to reconsider Assad support

The U.S. has made clear that it will not negotiate with Russia over Syria, which has been a key ally of the Assad regime in the fight against the Islamic State terror group.

1. Obama and Cameron Call on NATO to Confront ISIS

Obama, Cameron to push for coalition against ISIS at NATO summit

Obama called on NATO to step up its defense spending and cooperation with the U.S. and other allies to counter the threat posed by the Islamic State.

1. Senator Barbara Mikulski, Maryland Democrat and Role Model, to Retire in 2017

Sen. Barbara Mikulski I Will Not Be Seeking a Sixth Term by Daniel Doherty

Sen. Barbara Mikulski, Maryland Democrat, is retiring from the Senate after more than two decades in the Senate.
